# Supplementary material for: Carbon-supported Ni and MoO2 nanoparticles with Fe3O4 cores as a protein adsorbent
Source: Royal Society of Chemistry journal article supplement (doi:10.1039/d0nj02916e), 2020-01-01
Supplement: d0nj02916e1.pdf [file d0nj02916e1.pdf]

## Carbon-supported Ni and MoO<sub>2</sub> nanoparticles with Fe<sub>3</sub>O<sub>4</sub> cores as Protein Adsorbent

Lina Zhang<sup>a</sup>, Min Zhang<sup>a\*</sup>, Libin Liu<sup>b</sup>, Yanqin Wang<sup>c</sup>, Jing Zheng<sup>a</sup>, Jingli Xu<sup>a</sup> .

### Synthesis of Fe<sub>3</sub>O<sub>4</sub>@PDA.

0.5g of the Fe<sub>3</sub>O<sub>4</sub> precursor was re-dispersed into 30 mL anhydrous ethanol and 20 mL deionized water. Then 0.2g of Tris and 5 mL of deionized water were dissolved in above-mentioned solution under magnetic stirring evenly, followed with the addition of 15 mg dopamine hydrochloride, 2 mL of anhydrous ethanol and 1 mL of deionized under constant magnetic stirring for 20h . After reaction for 20 h, the Fe<sub>3</sub>O<sub>4</sub>@PDA composites were collected and dried at 80 °C.

### Synthesis of Fe<sub>3</sub>O<sub>4</sub>@C/MoO<sub>2</sub>-Ni.

The above-mentioned Fe<sub>3</sub>O<sub>4</sub>@PDA composites and 20 mL deionized water were added into 50 mL beaker under ultrasonic for 3 min. Then 1 mmol NiCl<sub>2</sub>·6H<sub>2</sub>O and 0.25 g urea were dissolved in above-mentioned solution under magnetic stirring for 15 min, followed with the addition of 1 mmol Na<sub>2</sub>MoO<sub>4</sub>·2H<sub>2</sub>O under constant magnetic stirring for 15 min and ultrasonic for 3 min. Finally the mixture was transferred to a 50 mL Teflon-lined stainless steel autoclave, which was sealed and kept at 110 °C for 12 h. After cooling down to room temperature naturally, the product was washed with deionized water and absolute ethanol for several times and dried in air at 60 °C for 12h. Subsequently, the resulting product was annealed at 500°C in nitrogen for 2 h with a heating rate of 2 °C min<sup>-1</sup> obtain the desired Fe<sub>3</sub>O<sub>4</sub>@C/MoO<sub>2</sub>-Ni composites.

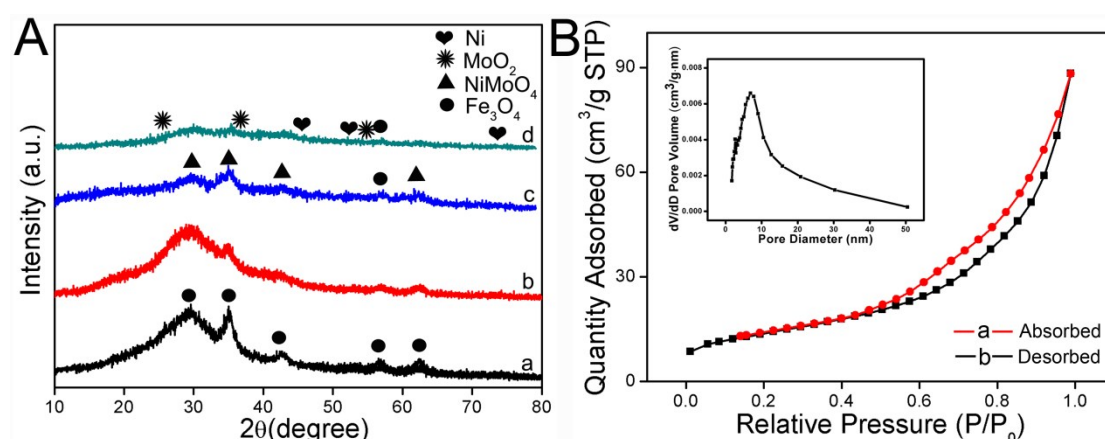

**Figure S1.** A: X-Ray diffraction patterns of Fe<sub>3</sub>O<sub>4</sub> (a), Fe<sub>3</sub>O<sub>4</sub>@PDA(b), Fe<sub>3</sub>O<sub>4</sub>@PDA@NiMoO<sub>4</sub>@ (c) and Fe<sub>3</sub>O<sub>4</sub>@C/MoO<sub>2</sub>-Ni(d); B : N<sub>2</sub> adsorption-desorption isotherm curve of porous Fe<sub>3</sub>O<sub>4</sub>@C/MoO<sub>2</sub>-Ni;

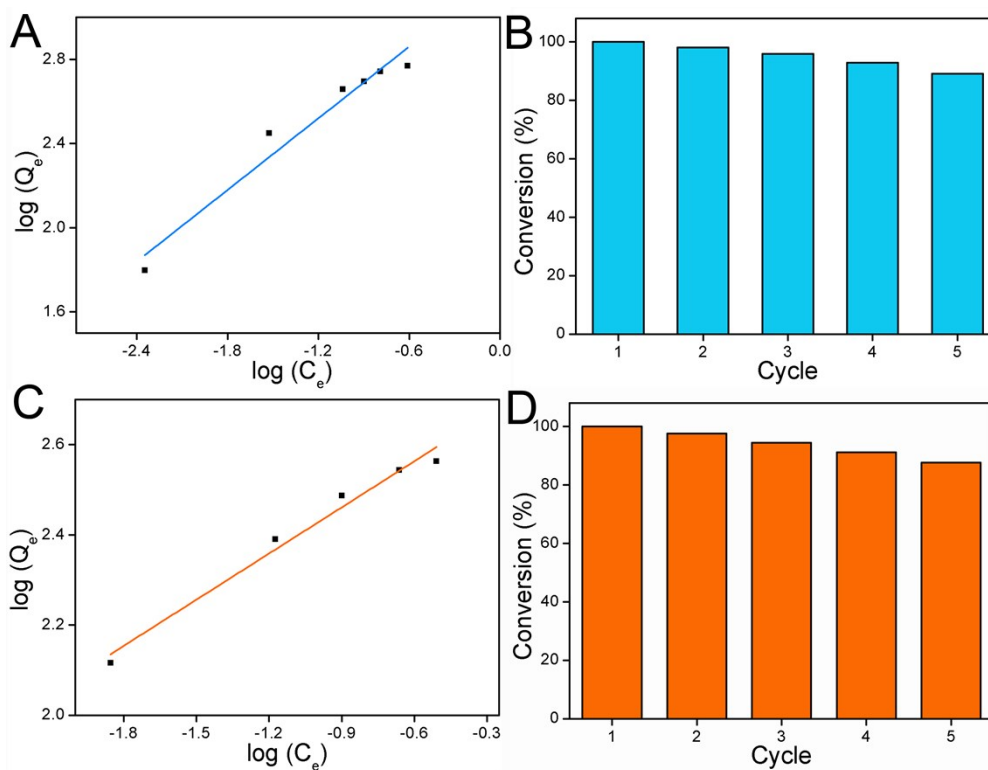

**Fig. S2** The linear regression by fitting the equilibrium adsorption data with the Freundlich Adsorption Model for  $\text{Fe}_3\text{O}_4@\text{MoO}_2/\text{C}-\text{Ni}$  composites(A), cyclic testing of  $\text{Fe}_3\text{O}_4@\text{MoO}_2/\text{C}-\text{Ni}$  composites(B); the linear regression of equilibrium adsorption data fitted by Freundlich Adsorption Model for  $\text{Fe}_3\text{O}_4@\text{C}/\text{MoO}_2-\text{Ni}$  composites(C); cyclic testing of  $\text{Fe}_3\text{O}_4@\text{C}/\text{MoO}_2-\text{Ni}$  composites (D).
